# Supplementary material for: Growth of 3D hierarchical porous NiO@carbon nanoflakes on graphene sheets for high-performance lithium-ion batteries
Source: Royal Society of Chemistry journal article supplement (doi:10.1039/c5cp06903c), 2016-01-01
Supplement: c5cp06903c1.pdf [file c5cp06903c1.pdf]

*Electronic Supplementary Information (ESI) for*  
Growth of 3D hierarchical porous NiO@Carbon  
nanoflakes on graphene sheets for high-  
performance Lithium-ion batteries

Xiongwei Wang<sup>a,‡</sup>, Ludan Zhang<sup>b,‡</sup>, Zehui Zhang<sup>a</sup>, Aishui Yu<sup>b</sup>, Peiyi Wu<sup>a,\*</sup>

<sup>a</sup>State Key Laboratory of Molecular Engineering of Polymers, Collaborative Innovation  
Center of Polymers and Polymer Composite Materials, Department of Macromolecular  
Science and Laboratory for Advanced Materials, Fudan University, Shanghai 200433, China

<sup>b</sup>Department of Chemistry, Shanghai key laboratory of Molecular Catalysis and Innovation  
Materials, Collaborative Innovation Center of Chemistry for energy Materials, Institute of  
New Energy, Fudan university, Shanghai 200438, P. R. China.

E-mail: [peiyiwu@fudan.edu.cn](mailto:peiyiwu@fudan.edu.cn)

‡These authors contributed equally to this work

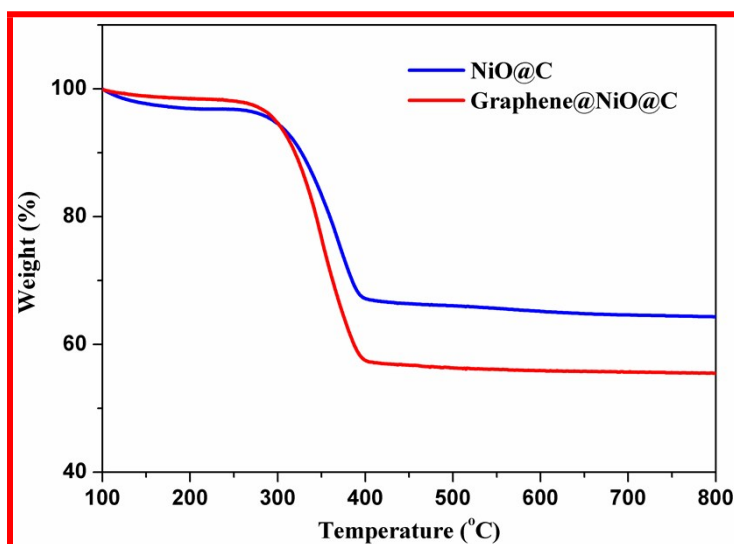

**Fig. S1** TGA curves of graphene@NiO@C and NiO@C after solvothermal process

In order to find the suitable annealing temperature in air, thermogravimetric analysis (TGA) of graphene@NiO@C and NiO@C after solvothermal process was measured in air, as shown in Fig. S1. According to the TGA curves, we choose the temperature 320 °C as the subsequent annealing temperature at which the graphene@NiO@C generates 10 wt% weight loss. Annealing under 320 °C in air can not only improve the crystallinity of NiO and graphene, but also reduce the amorphous carbon loss and prevent the NiO from transforming to Ni.

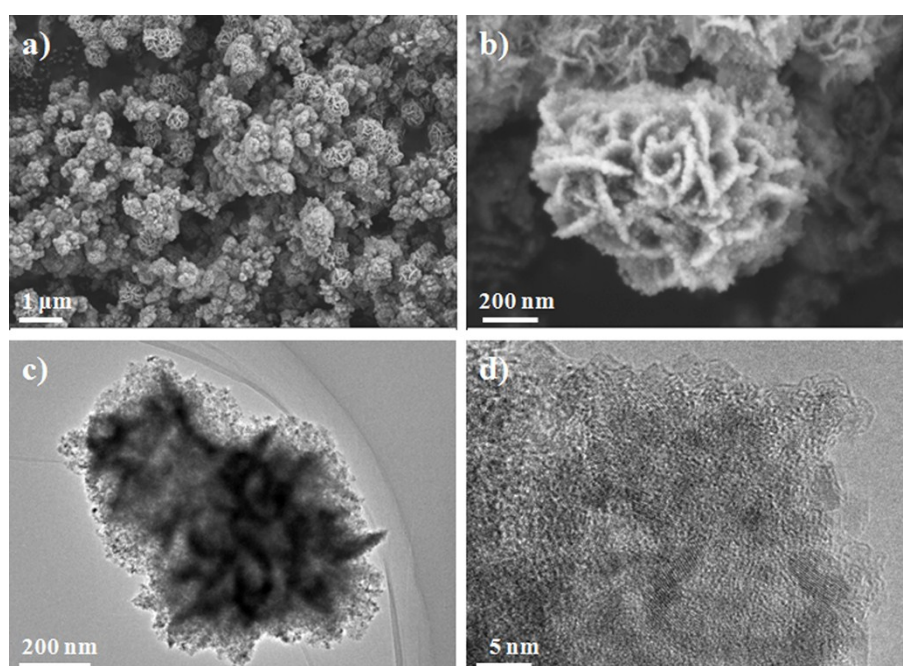

**Fig. S2** (a,b) FESEM images and (c) TEM images of NiO@C nanoflowers. (d) high-resolution TEM of NiO@C nanoflowers

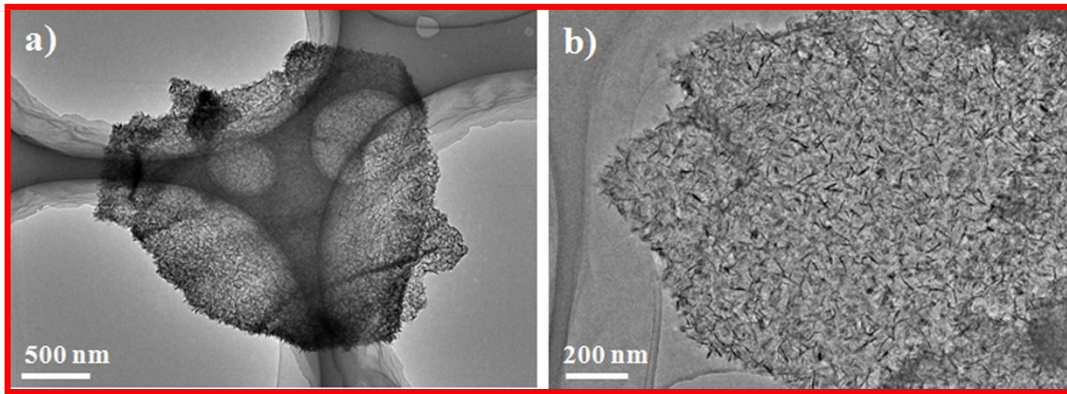

**Fig. S3** (a,b) TEM images of graphene@NiO@C composites

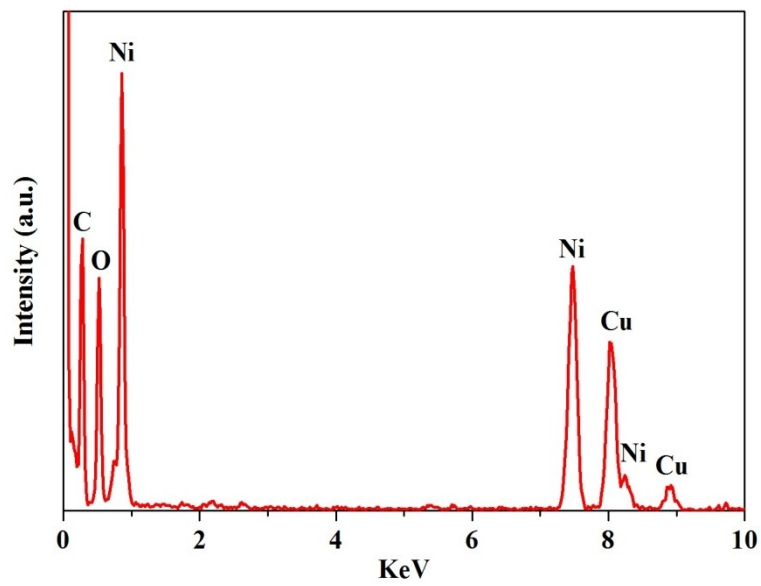

**Fig. S4** The energy dispersive X-ray (EDX) spectrum of the graphene@NiO@C composites.

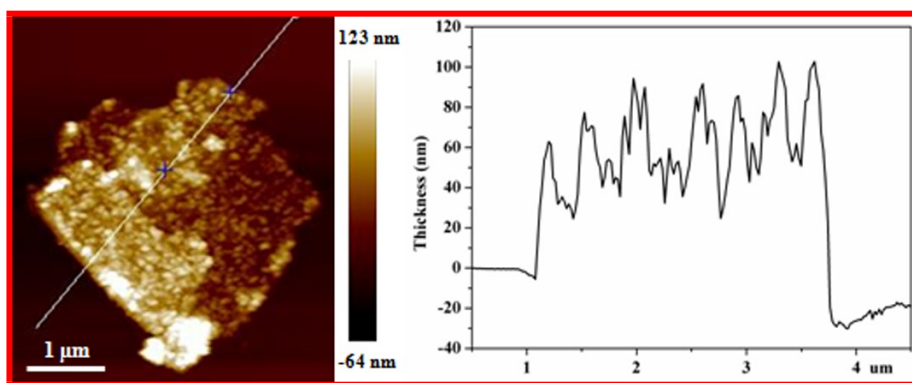

**Fig. S5** (a) The morphology of graphene@NiO@C composites in AFM and (b) the corresponding height-profile analysis along the line in (a)

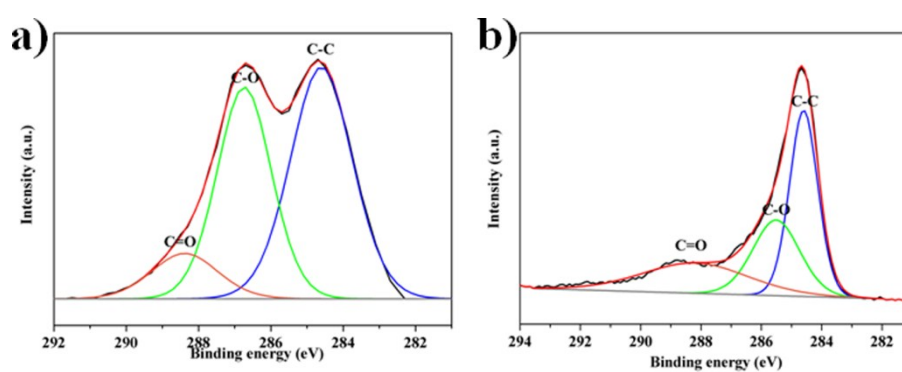

**Fig. S6** High resolution C 1s XPS spectra of GO (a) and graphene@NiO@C composites (b)

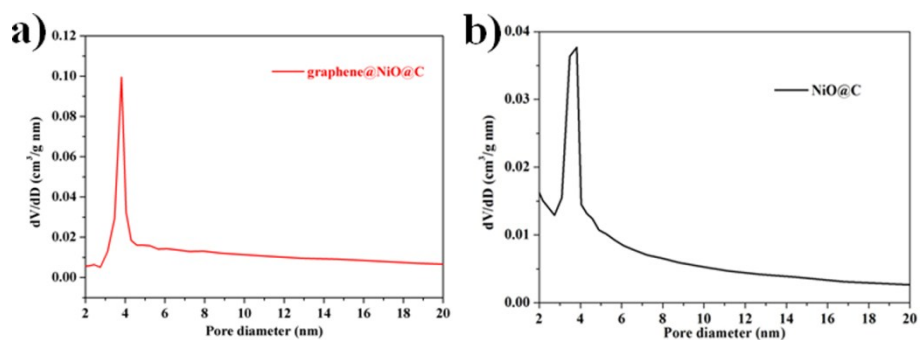

**Fig. S7** Pore-size distribution of graphen@NiO@C composites (a) and NiO@C nanoflowers (b)

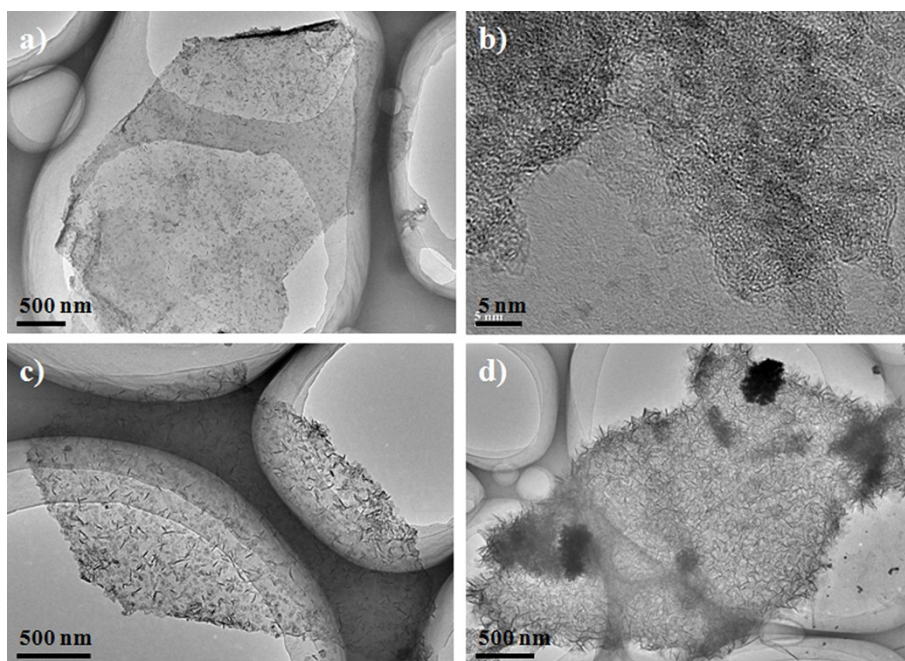

**Fig. S8** TEM images of graphene@NiO@C composites prepared by hydrothermal treatment of nickelocene with different dosages: (a,b) 0.045 g, (c) 0.075 g, (d) 0.135 g

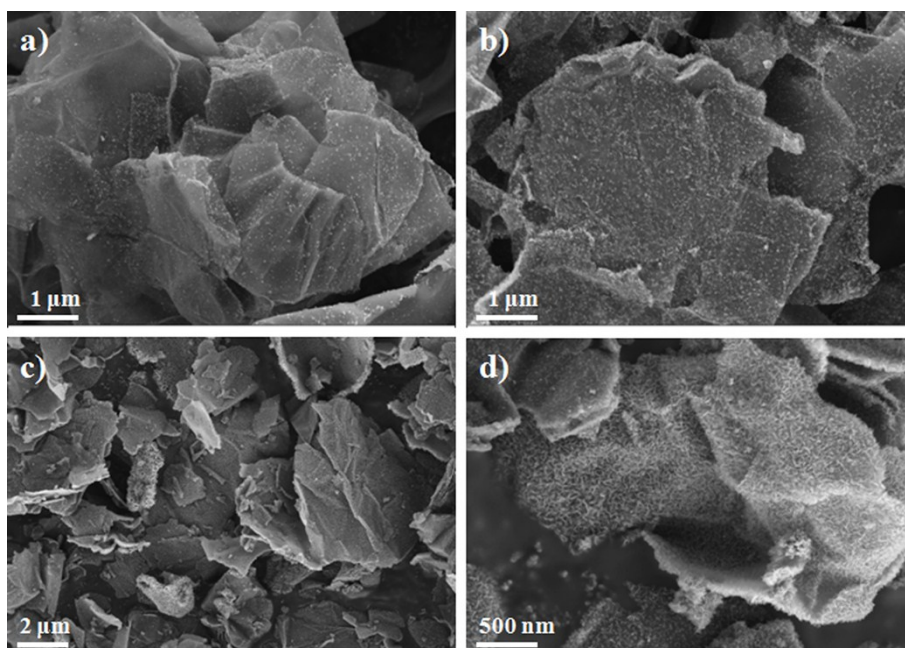

**Fig. S9** SEM images of graphene@NiO@C composites prepared by hydrothermal treatment of nickelocene with different dosages: (a) 0.045 g, (b) 0.075 g, (c,d) 0.135 g

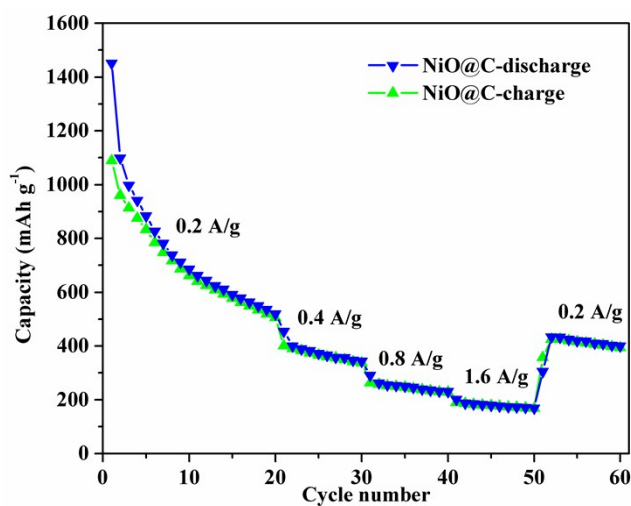

**Fig. S10** Rate performance of NiO@C nanoflowers at different current densities

**Table S1.** Summary of representative nickel oxide/carbon anode materials for lithium-ion batteries for comparison

| Typical examples                         | 1 <sup>st</sup> charge and discharge capacity (mAh g <sup>-1</sup> ) | Discharge capacity after 20 cycles (mAh g <sup>-1</sup> ) | Discharge capacity after 50 cycles (mAh g <sup>-1</sup> ) | Current density (mA g <sup>-1</sup> ) | Rate performance                                                                                                                                                         | Ref.      | year |
|------------------------------------------|----------------------------------------------------------------------|-----------------------------------------------------------|-----------------------------------------------------------|---------------------------------------|--------------------------------------------------------------------------------------------------------------------------------------------------------------------------|-----------|------|
| 3D porous NiO@C nanoflakes-graphene      | 1035 and 1490                                                        | 915                                                       | 754                                                       | 200                                   | A discharge capacity of 721 mAh g <sup>-1</sup> and 580 mAh g <sup>-1</sup> was obtained at 800 and 1600 mA g <sup>-1</sup> , respectively. the recovery ratio was ~90 % | This work | 2015 |
| Porous NiO-wrapped graphene sheets       | 1467 and 2169                                                        | ~1100                                                     | ~704                                                      | 200                                   | A discharge capacity of 403 mAh g <sup>-1</sup> was obtained at 1600 mA g <sup>-1</sup> ; the recovery ratio was ~50 %                                                   | [1]       | 2013 |
| NiO nanoflakes-graphene                  | 608 and 957                                                          | ~910                                                      | ~730                                                      | 100                                   | A discharge capacity of ~100 mAh g <sup>-1</sup> was obtained at 4000 mA g <sup>-1</sup> ; the recovery ratio was ~74 %                                                  | [2]       | 2013 |
| NiO nanoparticles -graphene              | 629 and 967                                                          | ~820                                                      | ~800                                                      | 100                                   | A discharge capacity of ~180 mAh g <sup>-1</sup> was obtained at 4000 mA g <sup>-1</sup> ; the recovery ratio was ~97 %                                                  | [2]       | 2013 |
| Ni-doping NiO nanoparticles -graphene    | 731 and 1226                                                         | ~780                                                      | /                                                         | 142                                   | A discharge capacity of ~720 mAh g <sup>-1</sup> was obtained at 355 mA g <sup>-1</sup>                                                                                  | [3]       | 2014 |
| N-doping carbon coated NiO nanocrystal   | 952 and 1205                                                         | ~710                                                      | ~710                                                      | 215                                   | A discharge capacity of ~420 mAh g <sup>-1</sup> was obtained at 7180 mA g <sup>-1</sup> ; the recovery ratio was ~98 %                                                  | [4]       | 2014 |
| graphene encapsulated porous carbon-NiO  | ~820 and ~1320                                                       | ~660                                                      | ~590                                                      | 71.8                                  | A discharge capacity of ~310 mAh g <sup>-1</sup> was obtained at 718 mA g <sup>-1</sup> ; the recovery ratio was ~71 %                                                   | [5]       | 2014 |
| NiO nanoparticles-graphene               | ~745 and ~1125                                                       | ~680                                                      | /                                                         | 100                                   | A discharge capacity of ~330 mAh g <sup>-1</sup> was obtained at 800 mA g <sup>-1</sup> ; the recovery ratio was ~83 %                                                   | [6]       | 2012 |
| Carbon coated NiO                        | 677 and 913                                                          | ~760                                                      | ~835                                                      | 100                                   | A discharge capacity of ~600 mAh g <sup>-1</sup> was obtained at 1000 mA g <sup>-1</sup> ; the recovery ratio was >100 %                                                 | [7]       | 2014 |
| NiO nanosheet anchored on ordered carbon | ~820 and 1621                                                        | ~880                                                      | ~845                                                      | 400                                   | A discharge capacity of ~800 mAh g <sup>-1</sup> was obtained at 800 mA g <sup>-1</sup> ; the recovery ratio was ~93 %                                                   | [8]       | 2015 |
| NiO nanosheets grown on TiC nanowires    | ~600 and 918                                                         | ~520                                                      | ~510                                                      | 200                                   | A discharge capacity of ~380 mAh g <sup>-1</sup> was obtained at 3000 mA g <sup>-1</sup> ; the recovery ratio was ~100 %                                                 | [9]       | 2015 |
| NiO nanosheet-graphene                   | 1056 and ~1640                                                       | ~1050                                                     | /                                                         | 71.8                                  | A discharge capacity of ~470 mAh g <sup>-1</sup> was obtained at 3590 mA g <sup>-1</sup> ; the recovery ratio was ~90.6 %                                                | [10]      | 2011 |
| Ni-doping NiO nanoparticles-graphene     | 751 and 1204                                                         | ~750                                                      | ~720                                                      | 200                                   | A discharge capacity of ~520 mAh g <sup>-1</sup>                                                                                                                         | [11]      | 2013 |

|                                               |                |       |       |      |                                                                                                                           |      |      |
|-----------------------------------------------|----------------|-------|-------|------|---------------------------------------------------------------------------------------------------------------------------|------|------|
|                                               |                |       |       |      | was obtained at 1000 mA g <sup>-1</sup> ; the recovery ratio was ~81 %                                                    |      |      |
| Graphene-NiO nanoparticles-graphene           | 639 and 1164   | ~720  | ~630  | 71.8 | A discharge capacity of ~370 mAh g <sup>-1</sup> was obtained at 718 mA g <sup>-1</sup> ; the recovery ratio was ~84 %    | [12] | 2013 |
| NiO nanosheets anchored on bowl-like carbon   | ~1010 and 1513 | ~1020 | 1011  | 200  | A discharge capacity of ~600 mAh g <sup>-1</sup> was obtained at 1600 mA g <sup>-1</sup> ; the recovery ratio was ~90 %   | [13] | 2015 |
| Porous NiO nanosheets grown on carbon cloth   | 882 and 1156   | ~820  | ~805  | 100  | A discharge capacity of ~400 mAh g <sup>-1</sup> was obtained at 2000 mA g <sup>-1</sup> ; the recovery ratio was ~90 %   | [14] | 2014 |
| Ni@NiO nanoparticles loaded on graphene ball  | 845 and 1156   | ~805  | ~770  | 1500 | A discharge capacity of ~680 mAh g <sup>-1</sup> was obtained at 3000 mA g <sup>-1</sup> ; the recovery ratio was ~85 %   | [15] | 2014 |
| Porous NiO nanosheets grown o carbon nanotube | 925 and 1377   | ~900  | ~820  | 800  | A discharge capacity of ~800 mAh g <sup>-1</sup> was obtained at 800 mA g <sup>-1</sup> ; the recovery ratio was ~100%    | [16] | 2015 |
| NiO nanosheets-graphene                       | 1000 and 1478  | ~1050 | ~910  | 50   | A discharge capacity of ~640 mAh g <sup>-1</sup> was obtained at 1500 mA g <sup>-1</sup> ; the recovery ratio was ~88%    | [17] | 2012 |
| Ultrathin carbon coated NiO nanoparticles     | 1196 and 1689  | ~1330 | ~1150 | 359  | A discharge capacity of ~1000 mAh g <sup>-1</sup> was obtained at 1436 mA g <sup>-1</sup> ; the recovery ratio was ~100 % | [18] | 2013 |
| NiO coated WMCNTs                             | ~860 and ~1140 | ~850  | ~850  | 143  | A discharge capacity of ~1000 mAh g <sup>-1</sup> was obtained at 718 mA g <sup>-1</sup> ; the recovery ratio was ~100 %  | [19] | 2014 |

## References



1. D. Xie, Q. Su, W. Yuan, Z. Dong, J. Zhang, G. Du, *J. Phys. Chem. C*, 2013, **117**, 24121-24128.
2. L. Zhuo, Y. Wu, W. Zhou, L. Wang, Y. Yu, X. Zhang, F. Zhao, *ACS Appl. Mater. Interfaces*, 2013, **5**, 7065-7071.
3. D.-H. Lee, J.-C. Kim, H.-W. Shim, D.-W. Kim, *ACS Appl. Mater. Interfaces*, 2014, **6**, 137-142.
4. Y. Ni, Y. Yin, P. Wu, H. Zhang, C. Cai, *ACS Appl. Mater. Interfaces*, 2014, **6**, 7346-7355.
5. S. Tao, W. Yue, M. Zhong, Z. Chen, Y. Ren, *ACS Appl. Mater. Interfaces*, 2014, **6**, 6332-6339.
6. Y. J. Mai, S. J. Shi, D. Zhang, Y. Lu, C. D. Gu and J. P. Tu, *J. Power Sources*, 2012, **204**, 155-161.
7. G. Zhou, J. M. Ma and L. Chen, *Electrochim. Acta*, 2014, **133**, 93-99.
8. Z. Y. Fan, J. Liang, W. Yu, S. J. Ding, S. D. Cheng, G. Yang, Y. L. Wang, Y. Xi, K. Xi and R. V. Kumar, *Nano Energy*, 2015, **16**, 152-162.
9. H. Huang, T. Feng, Y. Gan, M. Fang, Y. Xia, C. Liang, X. Tao and W. Zhang, *ACS Appl. Mater. Interfaces*, 2015, **7**, 11842-11848.
10. Y. Zou and Y. Wang, *Nanoscale*, 2011, **3**, 2615-2620.
11. J. T. Zai, C. Yu, L. Q. Tao, M. Xu, Y. L. Xiao, B. Li, Q. Y. Han, K. X. Wang and X. F. Qian, *Crystengcomm*, 2013, **15**, 6663-6671.
12. W. Yue, S. Jiang, W. Huang, Z. Gao, J. Li, Y. Ren, X. Zhao and X. Yang, *J. Mater. Chem. A*, 2013, **1**, 6928-6933.
13. J. Liang, H. Hu, H. Park, C. Xiao, S. Ding, U. Paik and X.W. Lou, *Energy Environ. Sci.*, 2015,

**8**, 1707-1711.

14. H. Long, T. Shi, H. Hu, S. Jiang, S. Xi and Z. Tang, *Sci. Rep.*, 2014, **4**, 7413-7422.
15. S.H. Choi, Y.N. Ko, J.-K. Lee and Y.C. Kang, *Sci. Rep.*, 2014, **4**, 5786-5793.
16. X. Xu, H. Tan, K. Xi, S. Ding, D. Yu, S. Cheng, G. Yang, X. Peng, A. Fakeeh and R.V. Kumar, *Carbon*, 2015, **84**, 491-499.
17. G. Zhou, D.-W. Wang, L.-C. Yin, N. Li, F. Li and H.-M. Cheng, *ACS Nano*, 2012, **6**, 3214-3223.
18. X. Liu, S.W. Or, C. Jin, Y. Lv, C. Feng and Y. Sun, *Carbon*, 2013, **60**, 215-220.
19. R.A. Susantyoko, X. Wang, Q. Xiao, E. Fitzgerald and Q. Zhang, *Carbon*, 2014, **68**, 619-627.
